# Supplementary material
Source: publisher figshare collection journal article supplement (https://tandf.figshare.com/ndownloader/files/41331714)
Supplement: Supplementary file 1 [file 41331714]

**Supplementary file for Table S1 and Figure S1 for:**

**Tracking the origins of the introduced terrestrial amphipod, *Puhuruhuru patersoni*, on sub-Antarctic Macquarie Island**

Elahe Parvizi a, Angela McGaughran a, Mark I. Stevens b,c*

a Te Aka Mātuatua/School of Science, Waikato University, Hamilton, New Zealand.

b Securing Antarctica’s Environmental Future, Earth and Biological Sciences, South Australian Museum, SA 5000, Australia.

c School of Biological Sciences, University of Adelaide, SA 5005, Australia.

**CONTACT** Mark I. Stevensmark.stevens@samuseum.sa.gov.au

**Table S1**. Specimen identification (ID), sampling information, and associated mtDNA clade following phylogenetic analysis of *Puhuruhuru patersoni*.

| **Specimen ID** | **GenBank accession number** | **Location** | **Latitude (south)** | **Longitude** | **Main Island** | **mtDNA clade** |
| --- | --- | --- | --- | --- | --- | --- |
| Nugget_1 | OQ734985 | Nugget Point | 46.46606 | 169.75764 | South Island | Clade 1 |
| Nugget_2 | OQ735041 | Nugget Point | 46.46606 | 169.75764 | South Island | Clade 1 |
| Nugget_3 | OQ735043 | Nugget Point | 46.46606 | 169.75764 | South Island | Clade 1 |
| Nugget_4 | OQ735042 | Nugget Point | 46.46606 | 169.75764 | South Island | Clade 1 |
| Nugget_5 | OQ735056 | Nugget Point | 46.46606 | 169.75764 | South Island | Clade 1 |
| Nugget_6 | OQ735060 | Nugget Point | 46.46606 | 169.75764 | South Island | Clade 1 |
| Nugget_7 | OQ735044 | Nugget Point | 46.46606 | 169.75764 | South Island | Clade 1 |
| Nugget_8 | OQ735061 | Nugget Point | 46.46606 | 169.75764 | South Island | Clade 1 |
| Nugget_9 | OQ735063 | Nugget Point | 46.46606 | 169.75764 | South Island | Clade 1 |
| Nugget_10 | OQ735059 | Nugget Point | 46.46606 | 169.75764 | South Island | Clade 1 |
| Nugget_11 | OQ735064 | Nugget Point | 46.46606 | 169.75764 | South Island | Clade 1 |
| Nugget_12 | OQ735057 | Nugget Point | 46.46606 | 169.75764 | South Island | Clade 1 |
| Nugget_13 | OQ735058 | Nugget Point | 46.46606 | 169.75764 | South Island | Clade 1 |
| Stewart_Paterson | OQ735067 | Paterson Inlet | 46.902732 | 168.118259 | Stewart Island | Clade 1 |
| Stewart_Bench_1 | OQ735075 | Bench Island | 46.90778 | 168.23239 | Stewart Island | Clade 1 |
| Macquarie_1 | OQ734997 | Macquarie Island | 54.499281 | 158.936131 | Macquarie Island | Clade 2 |
| Macquarie_2 | OQ735048 | Macquarie Island | 54.499281 | 158.936131 | Macquarie Island | Clade 2 |
| Macquarie_3 | OQ735032 | Macquarie Island | 54.499281 | 158.936131 | Macquarie Island | Clade 2 |
| Macquarie_4 | OQ735033 | Macquarie Island | 54.499281 | 158.936131 | Macquarie Island | Clade 2 |
| Macquarie_5 | OQ735049 | Macquarie Island | 54.499281 | 158.936131 | Macquarie Island | Clade 2 |
| Macquarie_6 | OQ735009 | Macquarie Island | 54.499281 | 158.936131 | Macquarie Island | Clade 2 |
| Macquarie_7 | OQ735030 | Macquarie Island | 54.499281 | 158.936131 | Macquarie Island | Clade 2 |
| Macquarie_8 | OQ735031 | Macquarie Island | 54.499281 | 158.936131 | Macquarie Island | Clade 2 |
| Macquarie_9 | OQ734991 | Macquarie Island | 54.499281 | 158.936131 | Macquarie Island | Clade 2 |
| Macquarie_10 | OQ734992 | Macquarie Island | 54.499281 | 158.936131 | Macquarie Island | Clade 2 |
| Macquarie_11 | OQ734994 | Macquarie Island | 54.499281 | 158.936131 | Macquarie Island | Clade 2 |
| Macquarie_12 | OQ734995 | Macquarie Island | 54.499281 | 158.936131 | Macquarie Island | Clade 2 |
| Macquarie_13 | OQ734996 | Macquarie Island | 54.499281 | 158.936131 | Macquarie Island | Clade 2 |
| Macquarie_14 | OQ734998 | Macquarie Island | 54.499281 | 158.936131 | Macquarie Island | Clade 2 |
| Macquarie_15 | OQ734993 | Macquarie Island | 54.499281 | 158.936131 | Macquarie Island | Clade 2 |
| Macquarie_16 | OQ734999 | Macquarie Island | 54.499281 | 158.936131 | Macquarie Island | Clade 2 |
| Macquarie_17 | OQ735000 | Macquarie Island | 54.499281 | 158.936131 | Macquarie Island | Clade 2 |
| Macquarie_18 | OQ735001 | Macquarie Island | 54.499281 | 158.936131 | Macquarie Island | Clade 2 |
| Macquarie_19 | OQ735002 | Macquarie Island | 54.499281 | 158.936131 | Macquarie Island | Clade 2 |
| Macquarie_20 | OQ735003 | Macquarie Island | 54.499281 | 158.936131 | Macquarie Island | Clade 2 |
| Macquarie_21 | OQ735004 | Macquarie Island | 54.499281 | 158.936131 | Macquarie Island | Clade 2 |
| Macquarie_22 | OQ735005 | Macquarie Island | 54.499281 | 158.936131 | Macquarie Island | Clade 2 |
| Macquarie_23 | OQ735007 | Macquarie Island | 54.499281 | 158.936131 | Macquarie Island | Clade 2 |
| Macquarie_24 | OQ735047 | Macquarie Island | 54.499281 | 158.936131 | Macquarie Island | Clade 2 |
| Macquarie_25 | OQ735008 | Macquarie Island | 54.499281 | 158.936131 | Macquarie Island | Clade 2 |
| Macquarie_26 | OQ735006 | Macquarie Island | 54.499281 | 158.936131 | Macquarie Island | Clade 2 |
| Macquarie_27 | OQ735010 | Macquarie Island | 54.499281 | 158.936131 | Macquarie Island | Clade 2 |
| Macquarie_28 | OQ735011 | Macquarie Island | 54.499281 | 158.936131 | Macquarie Island | Clade 2 |
| Macquarie_29 | OQ735040 | Macquarie Island | 54.499281 | 158.936131 | Macquarie Island | Clade 2 |
| Macquarie_30 | OQ735012 | Macquarie Island | 54.499281 | 158.936131 | Macquarie Island | Clade 2 |
| Macquarie_31 | OQ735014 | Macquarie Island | 54.499281 | 158.936131 | Macquarie Island | Clade 2 |
| Macquarie_32 | OQ735013 | Macquarie Island | 54.499281 | 158.936131 | Macquarie Island | Clade 2 |
| Macquarie_33 | OQ735015 | Macquarie Island | 54.499281 | 158.936131 | Macquarie Island | Clade 2 |
| Macquarie_34 | OQ735016 | Macquarie Island | 54.499281 | 158.936131 | Macquarie Island | Clade 2 |
| Macquarie_35 | OQ735017 | Macquarie Island | 54.499281 | 158.936131 | Macquarie Island | Clade 2 |
| Macquarie_36 | OQ735018 | Macquarie Island | 54.499281 | 158.936131 | Macquarie Island | Clade 2 |
| Macquarie_37 | OQ735019 | Macquarie Island | 54.499281 | 158.936131 | Macquarie Island | Clade 2 |
| Macquarie_38 | OQ735020 | Macquarie Island | 54.499281 | 158.936131 | Macquarie Island | Clade 2 |
| Macquarie_39 | OQ735021 | Macquarie Island | 54.499281 | 158.936131 | Macquarie Island | Clade 2 |
| Macquarie_40 | OQ735022 | Macquarie Island | 54.499281 | 158.936131 | Macquarie Island | Clade 2 |
| Macquarie_41 | OQ735023 | Macquarie Island | 54.499281 | 158.936131 | Macquarie Island | Clade 2 |
| Macquarie_42 | OQ735024 | Macquarie Island | 54.499281 | 158.936131 | Macquarie Island | Clade 2 |
| Macquarie_43 | OQ735025 | Macquarie Island | 54.499281 | 158.936131 | Macquarie Island | Clade 2 |
| Macquarie_44 | OQ735026 | Macquarie Island | 54.499281 | 158.936131 | Macquarie Island | Clade 2 |
| Macquarie_45 | OQ735027 | Macquarie Island | 54.499281 | 158.936131 | Macquarie Island | Clade 2 |
| Macquarie_46 | OQ735028 | Macquarie Island | 54.499281 | 158.936131 | Macquarie Island | Clade 2 |
| Macquarie_47 | OQ735029 | Macquarie Island | 54.499281 | 158.936131 | Macquarie Island | Clade 2 |
| Ratanui_1 | OQ735045 | Ratanui | 46.51611 | 169.5584 | South Island | Clade 2 |
| Auckland_Is | OQ734987 | Auckland Island | 50.540896 | 166.272684 | Auckland Islands | Clade 3 |
| Adams_1 | OQ734990 | Adams Island | 50.866433 | 166.026804 | Auckland Islands | Clade 3 |
| Adams_2 | OQ734988 | Adams Island | 50.866433 | 166.026804 | Auckland Islands | Clade 3 |
| Adams_3 | OQ734989 | Adams Island | 50.866433 | 166.026804 | Auckland Islands | Clade 3 |
| Stewart_Bench_2 | OQ735034 | Bench Island | 46.90778 | 168.23239 | Stewart Island | Clade 4 |
| Stewart_Bench_3 | OQ735071 | Bench Island | 46.90778 | 168.23239 | Stewart Island | Clade 4 |
| Stewart_Bench_4 | OQ735035 | Bench Island | 46.90778 | 168.23239 | Stewart Island | Clade 4 |
| Stewart_Bench_5 | OQ735072 | Bench Island | 46.90778 | 168.23239 | Stewart Island | Clade 4 |
| Stewart_Bench_6 | OQ735052 | Bench Island | 46.90778 | 168.23239 | Stewart Island | Clade 4 |
| Stewart_Bench_7 | OQ735068 | Bench Island | 46.90778 | 168.23239 | Stewart Island | Clade 4 |
| Stewart_Bench_8 | OQ735070 | Bench Island | 46.90778 | 168.23239 | Stewart Island | Clade 4 |
| Stewart_Bench_9 | OQ735037 | Bench Island | 46.90778 | 168.23239 | Stewart Island | Clade 4 |
| Stewart_Bench_10 | OQ735074 | Bench Island | 46.90778 | 168.23239 | Stewart Island | Clade 4 |
| Stewart_Bench_11 | OQ735069 | Bench Island | 46.90778 | 168.23239 | Stewart Island | Clade 4 |
| Stewart_Bench_12 | OQ735051 | Bench Island | 46.90778 | 168.23239 | Stewart Island | Clade 4 |
| Stewart_Bench_13 | OQ735076 | Bench Island | 46.90778 | 168.23239 | Stewart Island | Clade 4 |
| Stewart_Bench_14 | OQ735050 | Bench Island | 46.90778 | 168.23239 | Stewart Island | Clade 4 |
| Snares_Oleasia | OQ735053 | Oleasia Forest | 48.021944 | 166.609353 | Snares Islands / Tini Heke | Clade 4 |
| Snares_Rinni | OQ735054 | Rinni Bay | na | na | Snares Islands | Clade 4 |
| Snares_Penguin | OQ735055 | near Penguin Colony | na | na | Snares Islands | Clade 4 |
| Invercargill | OQ734986 | Otatara Scenic Reserve, Invercargill | 46.431335 | 168.296045 | South Island | Clade 5 |
| Stewart_Bench_15 | OQ735036 | Bench Island | 46.90778 | 168.23239 | Stewart Island | Clade 5 |
| Stewart_Bench_16 | OQ735073 | Bench Island | 46.90778 | 168.23239 | Stewart Island | Clade 5 |
| Dunedin_1 | OQ735038 | Dunedin | 45.83862 | 170.49957 | South Island | Clade 5 |
| Dunedin_2 | OQ735039 | Dunedin | 45.83862 | 170.49957 | South Island | Clade 5 |
| Ratanui_2 | OQ735046 | Ratanui | 46.51611 | 169.5584 | South Island | Clade 5 |
| Ratanui_3 | OQ735065 | Ratanui | 46.51611 | 169.5584 | South Island | Clade 5 |
| Ratanui_4 | OQ735066 | Ratanui | 46.51611 | 169.5584 | South Island | Clade 5 |
| NZsouth_TheRocks | OQ734984 | The Rocks | 46.3826 | 168.03682 | South Island | Clade 5 |
| Nugget_14 | OQ735062 | Nugget Point | 46.46606 | 169.75764 | South Island | Clade 5 |

**
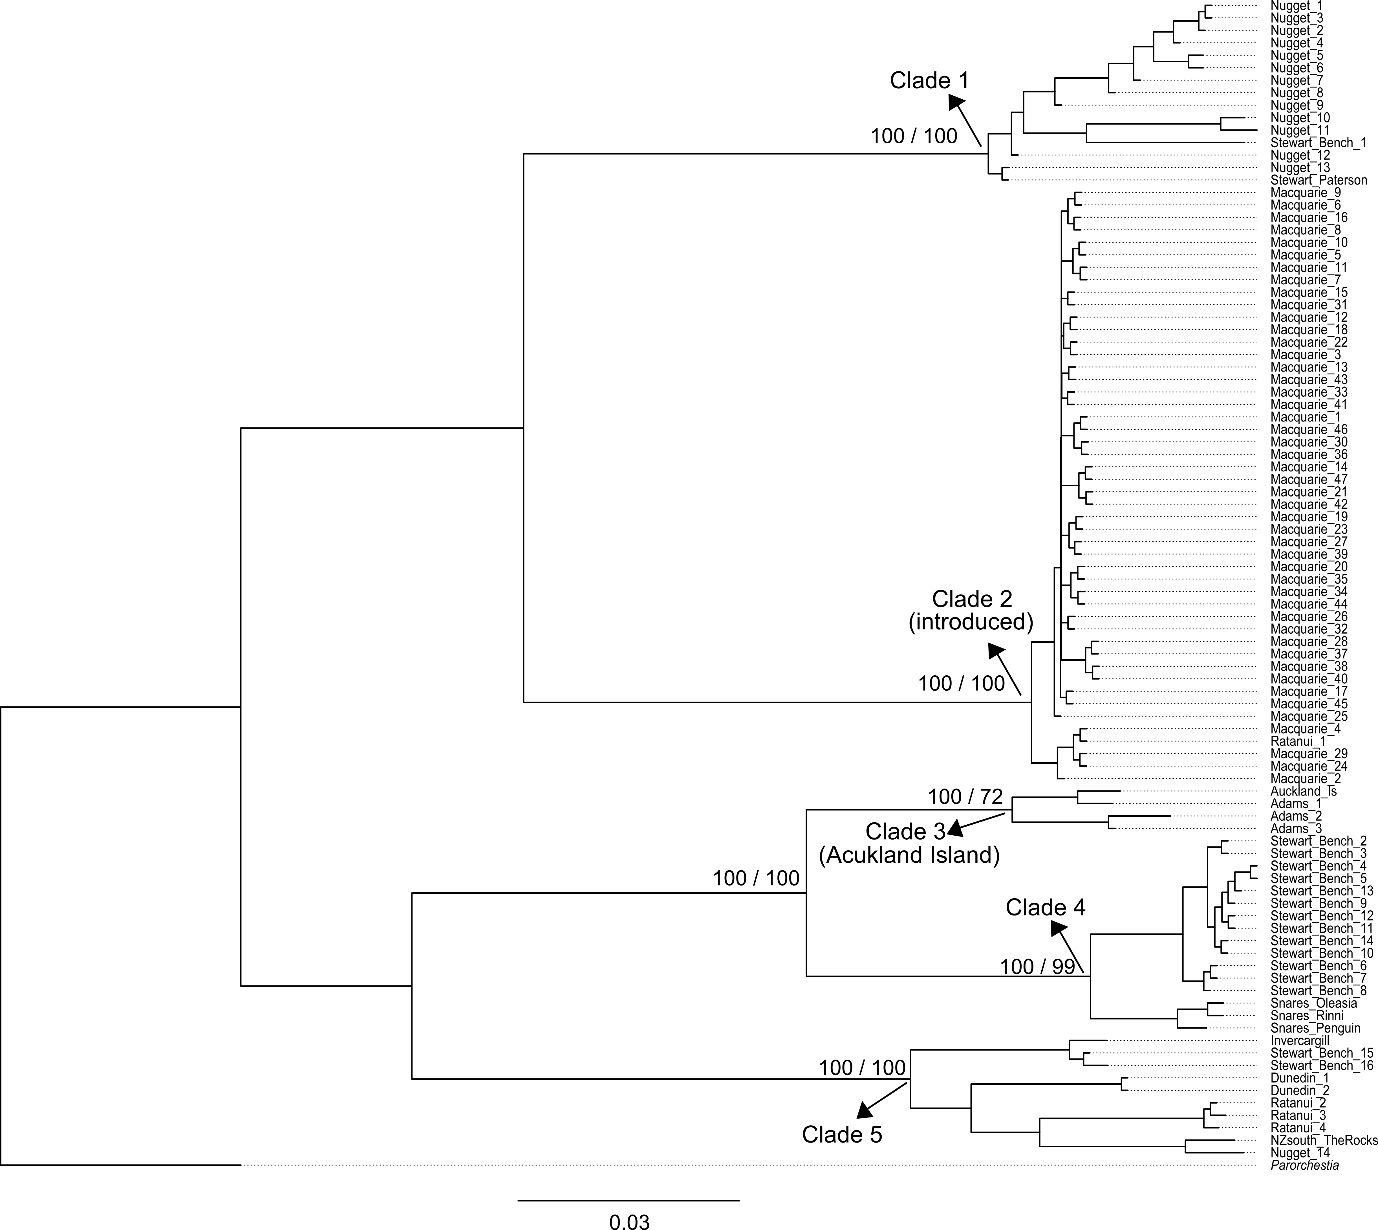
**

**Figure S1**. Phylogenetic tree of *Puhuruhuru patersoni* based on the COI mtDNA marker, with sample label details of each specimen corresponding to the specimen IDs provided in Table S1. Values on nodes indicate the posterior probabilities/bootstrap values obtained from Bayesian and maximum likelihood analyses, respectively.
